# Supplementary material for: Validation of a Microwave-Assisted Derivatization Gas Chromatography-Mass Spectrometry Method for the Quantification of 2-Hydroxybutyrate in Human Serum as an Early Marker of Diabetes Mellitus
Source: MDPI journal article supplement (doi:10.3390/molecules27061889), 2022-03-15
Supplement: s1 [file s1]

**Table S1.** Precision and accuracy of 6 calibrators, two quality controls and two serum samples using 3HB-d<sub>4</sub> as internal standard.

|         | 2HB (μM) | Precision (%) | Accuracy (%)     |
|---------|----------|---------------|------------------|
| Std 1   | 5        | 14            | 88               |
| Std 2   | 10       | 12            | 81               |
| Std 3   | 50       | 13            | 95               |
| Std 4   | 100      | 8             | 105              |
| Std 5   | 150      | 5             | 99               |
| Std 6   | 200      | 4             | 100              |
| QC 1    | 30       | 26            | 100              |
| QC 2    | 125      | 10            | 103              |
| Serum 1 | 86*      | 65            | NA               |
| Serum 2 | 244*     | 61            | 180 <sup>+</sup> |

Std: Standard. QC: Quality Control.

\* Obtained mean value. <sup>+</sup> Calculated as the recovery of 2HB spiked to serum 1.

**Table S2.** Comparison of the characteristics of our GC-MS method with those of two previously validated methods for 2HB measurements in serum or plasma.

|                                 | Özkan <i>et al.</i> [23]                                   | Chou <i>et al.</i> [22]                                             | Our Method                    |
|---------------------------------|------------------------------------------------------------|---------------------------------------------------------------------|-------------------------------|
| Method                          | GC-MS                                                      | GC-MS                                                               | GC-MS                         |
| Intended use                    | pregnant women (screening Down Syndrome)                   | Isolated post-challenge diabetes                                    | Dysglycemia and T2DM          |
| Sample type                     | Plasma                                                     | Serum                                                               | Serum                         |
| Sample volume                   | 100 μL                                                     | 100 μL                                                              | 300 μL                        |
| Internal standard               | Myristic acid-d <sub>27</sub>                              | Succinate -d <sub>4</sub>                                           | 2HB-d <sub>3</sub>            |
| Sample extraction               | Protein precipitation (acetonitrile)                       | Protein precipitation (acetone)                                     | Liquid:liquid (ethyl acetate) |
| Derivatization                  | MEOX pyridine (30°C, 90 min) & MSTFA+1%TMCS (60°C, 25 min) | MEOX pyridine (37°C, 90 min) & MSTFA (60°C 10 min) & 70 min at 50°C | BSTFA +1%TMCS (MAD, 2 min)    |
| Retention time (min)            | 7.5                                                        | 11.0                                                                | 3.7                           |
| Limit of detection (μM)         | 2.4                                                        | 0.96                                                                | NA                            |
| Limit of quantification (μM)    | 8.0                                                        | NA                                                                  | 5.0                           |
| Calibration range (μM)          | 8-480                                                      | NA-865                                                              | 5-200                         |
| Values in control subjects (μM) | 10 *                                                       | 87±29                                                               | 52±36                         |

BSTFA+1%TMCS: O-Bis(trimethylsilyl)trifluoroacetamide +1 % trimethylchlorosilane. MAD: microwave assisted derivatization. NA: Not available. MEOX: methoxyamine hydrochloride. MSTFA+1%TMCS: N-methyl-N-trimethylsilyl-trifluoroacetamide+1 % trimethylchlorosilane. NA: not available. T2DM: type 2 diabetes mellitus \* Mean concentration value of 11 to 15-week pregnant women (estimated from figure 3 of Reference 23).

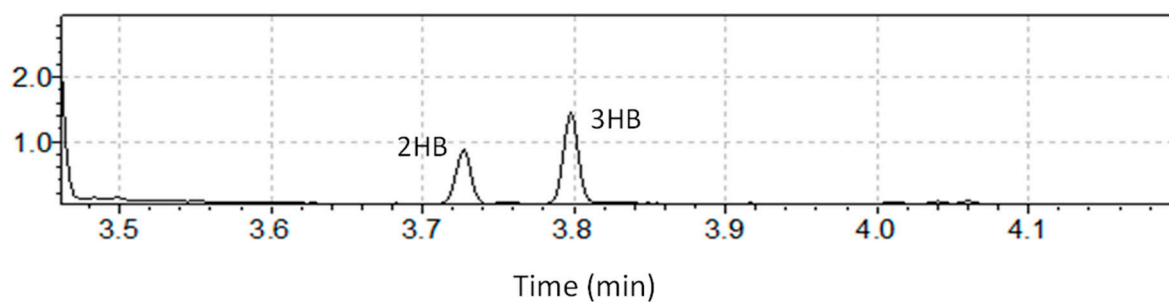

**Figure S1.** Chromatogram of a serum sample showing chromatographic resolution of 2-hydroxybutyrate (2HB) and 3-hydroxybutyrate (3HB).

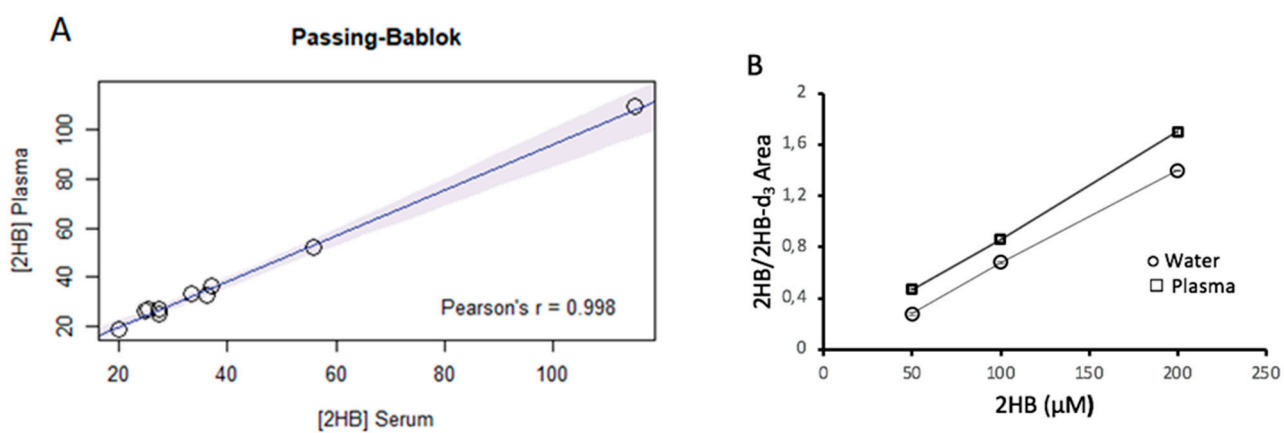

**Figure S2.** (a) Comparison of the results obtained in EDTA plasma and serum samples from the same blood extraction ( $n=10$ ). (b) Three-point curves spiked in human EDTA plasma compared with the respective curves spiked in water.
